# Supplementary material
Source: Research Square preprint supplement (doi:10.21203/rs.3.rs-9338724/v1)
Supplement: Supplementary file 1 [file 7098a362bf3c92c98835ca15.docx]

Figure 1C

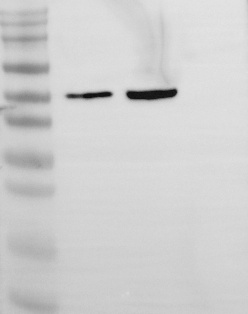

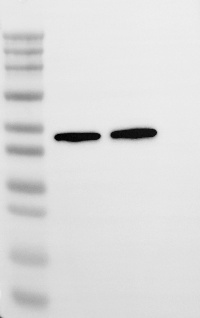


GSS β-actin

Figure 1F







GSH β-actin

Figure 1G







GSH β-actin

Figure 2C









GSH Grx1 β-actin

Figure 3A











STAT3 STAT3 GSH STAT3

Figure 3B









p-STAT3 STAT3 β-actin

Figure 3D









Mem. p-STAT3 STAT3 β-actin









Cyto. p-STAT3 STAT3 β-actin









Nuc. p-STAT3 STAT3 Histone H3

Figure 4A











p-STAT3 STAT3 Grx1 β-actin

Figure 4H







RORγ β-actin
